# Supplementary material
Source: HighWire-hosted journal article supplement (https://mbio.asm.org/content/9/6/e02287-18)
Supplement: inline-supplementary-material-6 [file inline-supplementary-material-6.pdf]

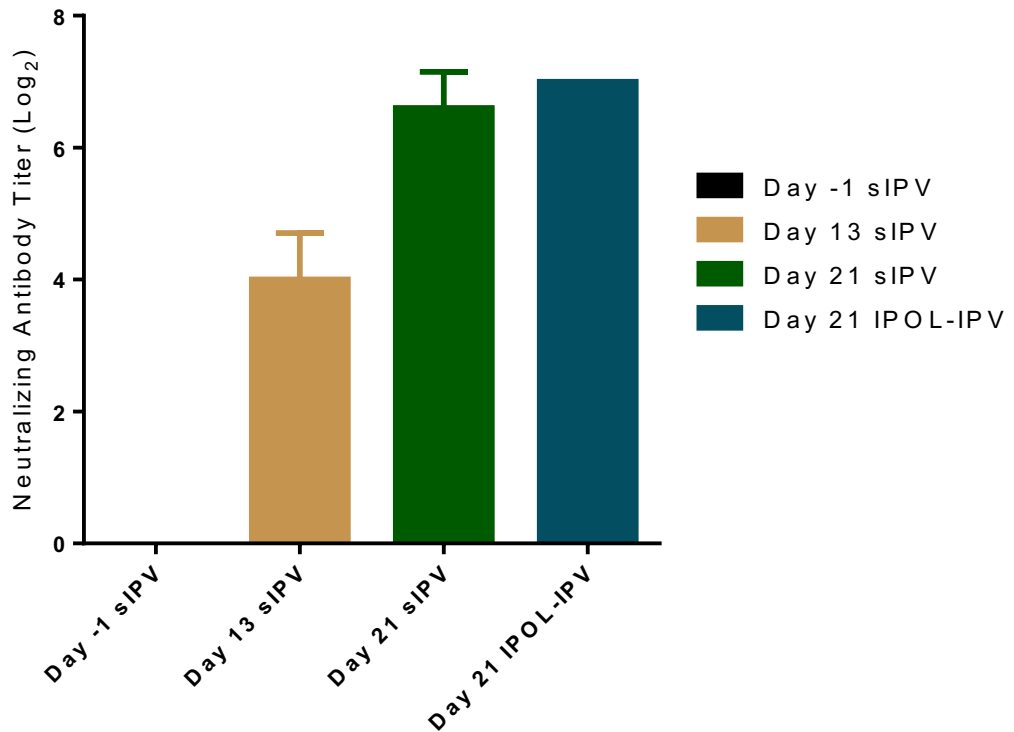

**Fig. S5.** Determination of optimal time for testing neutralizing antibody titer. Blood of vaccinated cPVR transgenic mice (n=8) sIPV was collected at days 13 and 21 to measure neutralizing antibody titers against 100TCID<sub>50</sub> of Sabin type 1 poliovirus. Commercial IPOL-IPV was included as a control.
